# Supplementary material
Source: PubMed Central journal article supplement (PMC3576924)
Supplement: NIHMS386948-supplement-01.pdf [file NIHMS386948-supplement-01.pdf]

563

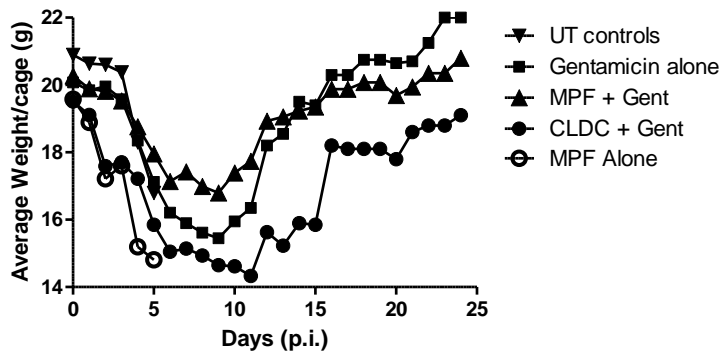

564

565

566 Supplemental Figure 1. Mouse weight corresponds with the stage of infection and severity of  
567 disease. Mice (n=10) were infected with 50 CFU of *Ft* Schu S4 (i.n.) and gentamicin (10 mg/kg)  
568 was given starting 24 h post-infection. MPF (10  $\mu$ g) or CLDC (100  $\mu$ g/ml) was given i.p. on  
569 days 1 and 4 post-infection along with the gentamicin treatment. Untreated controls were given  
570 D5W i.p. in lieu of immunotherapy. Survival was monitored for 25 days. Weight is recorded as  
571 the average daily combined weight of all the animals in the cage (n=5). Data are representative  
572 of three independent experiments.

573
